# Supplementary material
Source: PubMed Central journal article supplement (PMC9435024)
Supplement: NIHMS1832159-supplement-1.pdf [file NIHMS1832159-supplement-1.pdf]

## Supplementary Materials

Table 1: pathogens isolated

|                        |           |
|------------------------|-----------|
| <i>A. sobria</i>       | 1 (0.4)   |
| <i>A. xylosoxidans</i> | 1 (0.4)   |
| <i>A. baumannii</i>    | 25 (10.5) |
| <i>C. freundii</i>     | 7 (3.0)   |
| <i>E. cloacae</i>      | 20 (8.4)  |
| <i>E. coli</i>         | 67 (28.3) |
| <i>K. oxytoca</i>      | 3 (1.27)  |
| <i>K. pneumoniae</i>   | 66 (27.8) |
| <i>P. aeruginosa</i>   | 45 (19.0) |
| <i>P. cepacia</i>      | 1 (0.4)   |
| <i>S. marcescens</i>   | 1 (0.4)   |
| Total                  | 237       |

## Supplementary materials

Table 2: Length of stay in Hospital and ICU

| Primary infection site (vs. urine)            | Outcomes, Length of Stay (Beta estimate (STE); P-value) |                          |
|-----------------------------------------------|---------------------------------------------------------|--------------------------|
|                                               | Hospital LOS                                            | ICU LOS                  |
| Abdominal Fluid                               | 0.60 (0.27); p=0.03*                                    | 0.84 (0.48); p=0.07*     |
| Bile                                          | -0.10 (0.45); p=0.82                                    | -1.58 (0.83); p=0.06     |
| Blood                                         | 0.58 (0.26); p=0.02 *                                   | 0.98 (0.44); p= 0.03*    |
| IV catheter                                   | 0.48 (0.82); p= 0.56                                    | 1.03 (1.41); p=0.47      |
| Respiratory                                   | 0.96 (0.19); p < 0.001*                                 | 1.35 (0.33); p<0.001*    |
| Other                                         | 0.74 (0.33); p=0.02*                                    | 0.61 (0.57); p= 0.28     |
| <b>Pathogen Isolated (vs. <i>E. coli</i>)</b> |                                                         |                          |
| <i>A. xylosoxidans</i>                        | 1.43 (1.11); P= 0.20                                    | 1.98 (1.98); P =0.32     |
| <i>A. baumannii</i>                           | 0.34 (0.27); P =0.21                                    | 0.70 (0.48); P =0.15     |
| <i>C. freundii</i>                            | 0.60 (0.44); P =0.18                                    | 1.17 (0.79); P =0.14     |
| <i>E. cloacae</i>                             | 1.14 (0.31); P <0.001*                                  | 1.55 (0.55); P =0.004*   |
| <i>K. oxytoca</i>                             | -20.10 (2002.2); P =0.99                                | -19.35 (2002.2); P =0.99 |
| <i>K. pneumoniae</i>                          | 0.16 (0.20); P =0.43                                    | 0.39 (0.35); P =0.27     |
| <i>P. aeruginosa</i>                          | 0.71 (0.22); P =0.001*                                  | 1.08 (0.39); P =0.01*    |
| <i>P. cepacia</i>                             | 2.11 (1.11); P =0.06                                    | 2.89 (1.98); P =0.15     |
| <i>S. marcescens</i>                          | 0.60 (1.12); P =0.60                                    | 0.35 (2.01); P= 0.99     |
| <b>Other factors</b>                          |                                                         |                          |
| Infection at site of transplant               | -5.45 (0.16); P <0.001*                                 | -0.93 (0.28); P <0.001*  |
| Carbapenem sensitive                          | -0.17 (0.36); P =0.65                                   | 0.02 (0.63); P =0.97     |

Supplementary Materials

Table 3: Definitive Therapies Used in Carbapenem Resistant Infections

|                                             | <b>Total uses (%)<sup>†</sup></b> | <b>Monotherapy (%)<sup>‡</sup></b> | <b>Combination therapy (%)<sup>‡</sup></b> |
|---------------------------------------------|-----------------------------------|------------------------------------|--------------------------------------------|
| Aminoglycosides                             | 18 (15.9)                         | 3 (16.7)                           | 15 (83.3)                                  |
| Aztreonam                                   | 5 (4.4)                           | 2 (40.0)                           | 3 (60.0)                                   |
| Cephalosporin                               | 25 (22.1)                         | 7 (28.0)                           | 18 (72.0)                                  |
| Cephalosporin/ $\beta$ -lactamase inhibitor | 9 (7.9)                           | 5 (55.6)                           | 4 (44.5)                                   |
| Carbapenem                                  | 16 (14.2)                         | 7 (43.8)                           | 9 (56.3)                                   |
| Fluoroquinolone                             | 16 (14.2)                         | 9 (56.3)                           | 7 (43.8)                                   |
| Fosfomycin                                  | 19 (16.8)                         | 17 (89.5)                          | 2 (10.5)                                   |
| Other                                       | 13 (11.5)                         | 2 (15.4)                           | 11 (84.6)                                  |
| Penicillin/B-lactamase inhibitor            | 11 (9.7)                          | 5 (45.5)                           | 6 (54.5)                                   |
| Polymyxin                                   | 24 (21.3)                         | 1 (4.2)                            | 23 (95.8)                                  |

<sup>†</sup> Percent of total infection events (n=225)

<sup>‡</sup> Percent of total uses
